# Supplementary material
Source: PubMed Central journal article supplement (PMC6658761)
Supplement: AAC.00393-19-s0001.pdf [file AAC.00393-19-s0001.pdf]

- 1 **Figure S1:** Mean BKPyV NAb titers against BKPyV genotype I, II and IV according to the
- 2 IVIg preparation

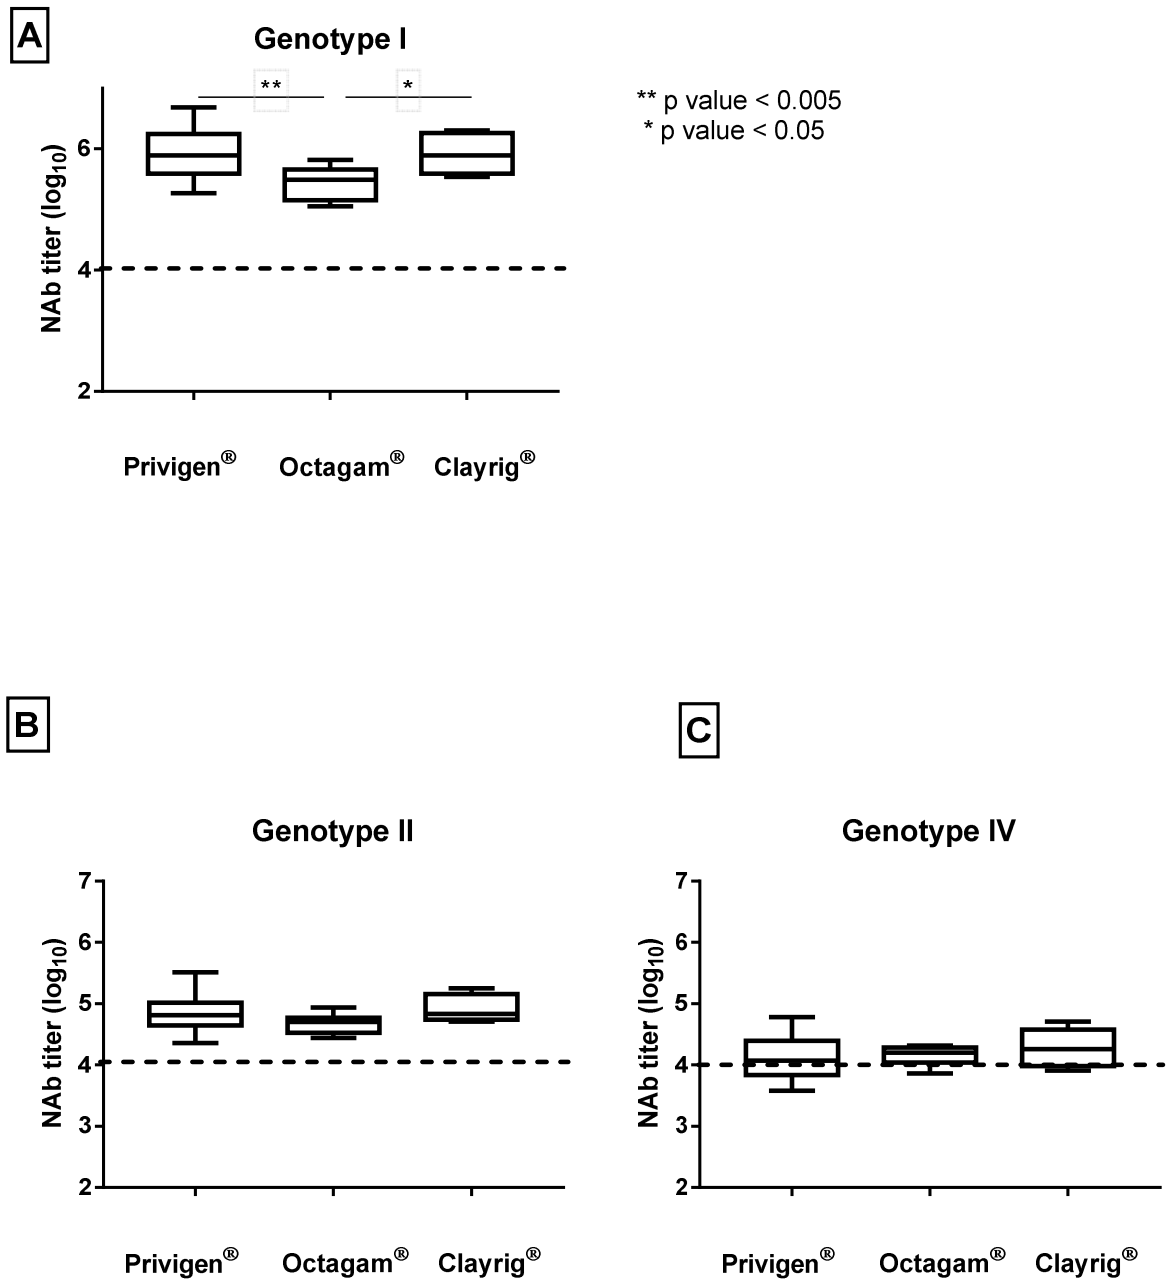

3  
4

5 **Figure S2:** Neutralization assays of infection performed on primary cells (human Renal  
6 Proximal Tubule Epithelial Cells, hRPTEC) using infectious BKPyV strain.

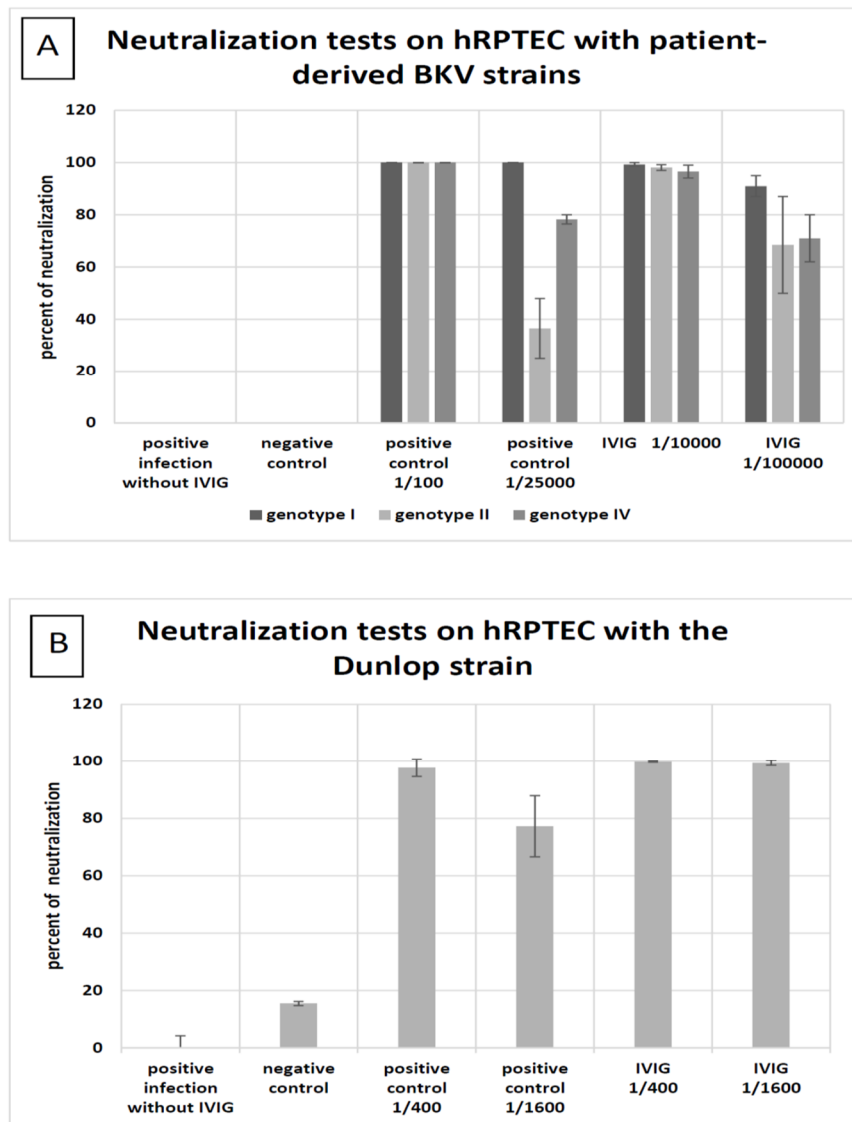

7

8 IVIg preparation tested: Privigen®.

9 The negative control consisted of an anti-BKPyV-negative serum; the positive control

10 consisted of a pool of >100 anti-BKPyV positive sera).

11

12

13 **Table S1:** BKPyV NAb titers ( $\log_{10}$  IC50) measured in Privigen<sup>®</sup> aliquots of 25 lots.

|                                 | <b>Genotype I</b><br>Mean NAb titer $\log_{10}$<br>( +/- standard<br>deviation) | <b>Genotype II</b><br>Mean NAb titer $\log_{10}$<br>( +/- standard<br>deviation) | <b>Genotype IV</b><br>Mean NAb titer $\log_{10}$<br>( +/- standard<br>deviation) |
|---------------------------------|---------------------------------------------------------------------------------|----------------------------------------------------------------------------------|----------------------------------------------------------------------------------|
| <b>Lot 4326200074</b>           | 6.1 (+/- 0.12)                                                                  | 5.3 (+/- 0.59)                                                                   | 4.2 (+/-0.20)                                                                    |
| <b>Lot 4326200082</b>           | 6.3 (+/- 0.27)                                                                  | 4.7 (+/- 0.28)                                                                   | 4.0 (+/- 0.18)                                                                   |
| <b>Lot 4326300089</b>           | 6.0 (+/- 0.12)                                                                  | 4.7 (+/- 0.38)                                                                   | 4.2 (+/- 0.54)                                                                   |
| <b>Lot 4326300099</b>           | 6.4 (+/- 0.18)                                                                  | 5.0 (+/- 0.22)                                                                   | 3.6 (+/- 0.05)                                                                   |
| <b>Lot 4326300118</b>           | 6.4 (+/- 0.33)                                                                  | 5.5 (+/- 0.51)                                                                   | 4.2 (+/- 0.44)                                                                   |
| <b>Lot 4372000012</b>           | 5.6 (+/- 0.12)                                                                  | 5.2 (+/- 0.86)                                                                   | 3.9 (+/- 0.33)                                                                   |
| <b>Lot 4372000014</b>           | 6.3 (+/- 0.32)                                                                  | 4.7 (+/- 0.66)                                                                   | 3.7 (+/- 0.17)                                                                   |
| <b>Lot 4372000021</b>           | 5.7 (+/- 0.26)                                                                  | 4.9 (+/- 0.21)                                                                   | 3.9 (+/- 0.16)                                                                   |
| <b>Lot 4372000024</b>           | 5.6 (+/- 0.14)                                                                  | 4.4 (+/- 0.64)                                                                   | 3.8 (+/- 0.12)                                                                   |
| <b>Lot 4326300092</b>           | 5.9 (+/- 0.52)                                                                  | 4.7 (+/- 0.38)                                                                   | 4.4 (+/- 0.39)                                                                   |
| <b>Lot 4326300098</b>           | 5.5 (+/- 0.19)                                                                  | 4.4 (+/- 0.30)                                                                   | 4.3 (+/- 0.39)                                                                   |
| <b>Lot 4326300058</b>           | 5.8 (+/- 0.20)                                                                  | 5.1 (+/- 0.51)                                                                   | 3.8 (+/- 0.29)                                                                   |
| <b>Lot 4372000013</b>           | 5.6 (+/- 0.13)                                                                  | 4.5 (+/- 0.16)                                                                   | 4.4 (+/- 0.18)                                                                   |
| <b>Lot 4326300084</b>           | 5.9 (+/- 0.06)                                                                  | 4.8 (+/- 0.20)                                                                   | 3.8 (+/- 0.21)                                                                   |
| <b>Lot 4372000011</b>           | 5.4 (+/- 0.10)                                                                  | 4.9 (+/- 0.52)                                                                   | 3.9 (+/- 0.16)                                                                   |
| <b>Lot 4326200064</b>           | 5.9 (+/- 0.39)                                                                  | 5.0 (+/- 0.25)                                                                   | 4.7 (+/- 0.25)                                                                   |
| <b>Lot 4326300096</b>           | 5.3 (+/- 0.11)                                                                  | 4.7 (+/- 0.23)                                                                   | 3.8 (+/- 0.34)                                                                   |
| <b>Lot 4372000023</b>           | 6.7 (+/- 0.38)                                                                  | 5.1 (+/- 0.26)                                                                   | 4.8 (+/- 0.20)                                                                   |
| <b>Lot 4372000042</b>           | 6.4 (+/- 0.38)                                                                  | 5.0 (+/- 0.15)                                                                   | 4.7 (+/- 0.24)                                                                   |
| <b>Lot 4326200060</b>           | 6.0 (+/- 0.40)                                                                  | 4.8 (+/- 0.23)                                                                   | 4.0 (+/- 0.24)                                                                   |
| <b>Lot 4326200063</b>           | 5.8 (+/- 0.29)                                                                  | 4.6 (+/- 0.15)                                                                   | 3.9 (+/- 0.21)                                                                   |
| <b>Lot 4372000040</b>           | 5.7 (+/- 0.12)                                                                  | 4.6 (+/- 0.16)                                                                   | 4.5 (+/- 0.26)                                                                   |
| <b>Lot 4372000041</b>           | 5.3 (+/- 0.06)                                                                  | 4.4 (+/- 0.02)                                                                   | 4.1 (+/- 0.15)                                                                   |
| <b>Lot 4372000028</b>           | 6.6 (+/- 0.33)                                                                  | 5.6 (+/- 0.03)                                                                   | 4.3 (+/- 0.34)                                                                   |
| <b>Lot 4372000029</b>           | 6.1 (+/- 0.30)                                                                  | 5.0 (+/- 0.28)                                                                   | 4.5 (+/- 0.19)                                                                   |
| <b>Median</b>                   | 5.9                                                                             | 4.8                                                                              | 4.1                                                                              |
| <b>IQR</b>                      | 5.6-6.2                                                                         | 4.6-5.0                                                                          | 3.8-4.4                                                                          |
| <b>Mean</b>                     | 5.9 (+/- 0.39)                                                                  | 4.9 (+/- 0.33)                                                                   | 4.1 (+/- 0.34)                                                                   |
| <b>P Value</b>                  | $\geq 0.07$                                                                     | $\geq 0.25$                                                                      | $> 1.0$                                                                          |
| <b>Batch-to-batch variation</b> | 6.55%                                                                           | 6.5%                                                                             | 8%                                                                               |

15 **Table S2:** BKPyV NAb titers ( $\log_{10}$  IC50) measured in Octagam<sup>®</sup> aliquots of 9 lots.

|                                 | <b>Genotype I</b><br>Mean Nab titer $\log_{10}$<br>( +/- standard deviation) | <b>Genotype II</b><br>Mean Nab titer $\log_{10}$<br>( +/- standard deviation) | <b>Genotype IV</b><br>Mean Nab titer $\log_{10}$<br>( +/- standard deviation) |
|---------------------------------|------------------------------------------------------------------------------|-------------------------------------------------------------------------------|-------------------------------------------------------------------------------|
| <b>Lot A513B8431</b>            | 5.5 (+/- 0.20)                                                               | 4.7 (+/- 0.26)                                                                | 4.2 (+/- 0.07)                                                                |
| <b>Lot B350B8442</b>            | 5.1 (+/- 0.36)                                                               | 4.5 (+/- 0.23)                                                                | 4.3 (+/- 0.69)                                                                |
| <b>Lot B408C8441</b>            | 5.7 (+/- 0.50)                                                               | 4.7 (+/- 0.27)                                                                | 4.1 (+/- 0.14)                                                                |
| <b>Lot B410C8442</b>            | 5.1 (+/- 0.21)                                                               | 4.6 (+/- 0.17)                                                                | 4.0 (+/- 0.18)                                                                |
| <b>Lot B439B8441</b>            | 5.5 (+/- 0.26)                                                               | 4.7 (+/-0.54)                                                                 | 4.2 (+/- 0.23)                                                                |
| <b>Lot B439C8442</b>            | 5.8 (+/- 0.11)                                                               | 4.4 (+/- 0.15)                                                                | 4.3 (+/- 0.21)                                                                |
| <b>Lot B448A8441</b>            | 5.6 (+/- 0.56)                                                               | 4.8 (+/- 0.24)                                                                | 4.3 (+/- 0.18)                                                                |
| <b>Lot C427B8441</b>            | 5.2 (+/- 0.12)                                                               | 4.9 (+/- 0.52)                                                                | 3.9 (+/- 0.30)                                                                |
| <b>Lot B505B8441</b>            | 5.2 (+/- 0.53)                                                               | 4.6 (+/- 0.21)                                                                | 4.2 (+/- 0.60)                                                                |
| <b>Median</b>                   | 5.5                                                                          | 4.7                                                                           | 4.2                                                                           |
| <b>IQR</b>                      | 5.2-5.7                                                                      | 4.5-4.8                                                                       | 4.1-4.3                                                                       |
| <b>Mean</b>                     | 5.4 (+/- 0.28)                                                               | 4.7 (+/- 0.16)                                                                | 4.2 (+/- 0.16)                                                                |
| <b>P Value</b>                  | > 0.43                                                                       | > 1.0                                                                         | > 1.0                                                                         |
| <b>Batch-to-batch variation</b> | 4.93%                                                                        | 3.24%                                                                         | 3.39%                                                                         |

16

17

18 **Table S3:** BKPyV NAb titers ( $\log_{10}$  IC50) measured in Clairyg<sup>®</sup> aliquots of 9 lots.

|                                 | <b>Genotype I</b><br>Mean Nab titer $\log_{10}$<br>( +/- standard<br>deviation) | <b>Genotype II</b><br>Mean Nab titer $\log_{10}$<br>( +/- standard<br>deviation) | <b>Genotype IV</b><br>Mean Nab titer $\log_{10}$<br>( +/- standard<br>deviation) |
|---------------------------------|---------------------------------------------------------------------------------|----------------------------------------------------------------------------------|----------------------------------------------------------------------------------|
| <b>Lot 15L04649</b>             | 5.8 (+/- 0.21)                                                                  | 4.7 (+/- 0.10)                                                                   | 4.3 (+/- 0.41)                                                                   |
| <b>Lot 15L07118</b>             | 5.6 (+/- 0.23)                                                                  | 4.8 (+/- 0.22)                                                                   | 3.9 (+/- 0.45)                                                                   |
| <b>Lot 15L07648</b>             | 6.3 (+/- 0.79)                                                                  | 5.2 (+/- 0.41)                                                                   | 4.7 (+/- 0.52)                                                                   |
| <b>Lot 15L07892</b>             | 5.6 (+/- 0.12)                                                                  | 5.3 (+/- 0.19)                                                                   | 4.5 (+/- 0.50)                                                                   |
| <b>Lot 16L02597</b>             | 6.3 (+/- 0.65)                                                                  | 5.0 (+/- 0.03)                                                                   | 4.0 (+/- 0.19)                                                                   |
| <b>Lot 16L02598</b>             | 6.1 (+/- 0.09)                                                                  | 4.7 (+/- 0.15)                                                                   | 4.0 (+/- 0.04)                                                                   |
| <b>Lot 16L04432</b>             | 5.5 (+/- 0.31)                                                                  | 4.8 (+/- 0.05)                                                                   | 4.3 (+/- 0.22)                                                                   |
| <b>Lot 16L04714</b>             | 5.9 (+/- 0.05)                                                                  | 4.8 (+/- 0.22)                                                                   | 4.1 (+/- 0.13)                                                                   |
| <b>Lot 16L06006</b>             | 6.3 (+/- 0.12)                                                                  | 5.1 (+/- 0.25)                                                                   | 4.7 (+/- 0.25)                                                                   |
| <b>Median</b>                   | 5.9                                                                             | 4.8                                                                              | 4.3                                                                              |
| <b>IQR</b>                      | 5.6-6.3                                                                         | 4.7-5.2                                                                          | 4.0-4.6                                                                          |
| <b>Mean</b>                     | 5.9 (+/- 0.31)                                                                  | 4.9 (+/- 0.21)                                                                   | 4.3 (+/- 0.30)                                                                   |
| <b>P Value</b>                  | $\geq 0.31$                                                                     | $\geq 0.60$                                                                      | $\geq 0.40$                                                                      |
| <b>Batch-to-batch variation</b> | 5.53%                                                                           | 4.53%                                                                            | 7.09%                                                                            |

19

20

21 **Table S4:** BKPyV genotype I NAb titers ( $\log_{10}$  IC50) measured during IVIG treatment.

| Patients      | IVIG regimen | D0         | D1         | D22        | D23        | D44        | D45        |
|---------------|--------------|------------|------------|------------|------------|------------|------------|
| Patient 1     | SIDS         | 3.9        | 5.2        | /          | 4.9        | /          | /          |
| Patient 2     | SIDS         | 3.0        | 4.1        | 3.4        | 4.6        | 3.5        | 3.9        |
| Patient 3     | SIDS         | 3.1        | 4.1        | 3.9        | 4.2        | /          | 3.9        |
| Patient 4     | SIDS         | 2.8        | 4.8        | 4.0        | 4.4        | 4.0        | 4.1        |
| Patient 5     | SIDS         | 2.7        | 4.4        | 4.4        | 4.0        | 4.1        | 3.8        |
| Patient 6     | SIDS         | 3.9        | 4.7        | 4.3        | 4.9        | 4.5        | 4.3        |
| Patient 7     | SIDS         | 2.9        | 4.2        | 3.6        | 4.3        | 4.2        | 4.0        |
| Patient 8     | SIDS         | 2.6        | 4.4        | 3.8        | 4.5        | 4.6        | 3.7        |
| Patient 9     | SIDS         | 3.8        | 4.6        | 4.0        | 3.8        | 4.6        | 4.2        |
| Patient 10    | SIDS         | 3.7        | 4.1        | 3.9        | 4.0        | /          | /          |
| Patient 11    | SIDS         | NEG.       | 3.9        | 3.8        | 3.9        | /          | 3.8        |
| Patient 12    | SIDS         | 2.6        | 4.4        | 3.5        | 4.4        | /          | /          |
| Patient 13    | SIDS         | 3.7        | 4.4        | 3.8        | 4.5        | 3.8        | /          |
| Patient 14    | SIDS         | NEG.       | 3.6        | /          | 4.0        | /          | /          |
| Patient 15    | SIDS         | 3.1        | 4.2        | 3.9        | /          | 3.1        | /          |
| Patient 16    | SIDS         | 2.8        | 4.1        | 3.4        | /          | /          | /          |
| <b>Median</b> | <b>SIDS</b>  | <b>3.0</b> | <b>4.3</b> | <b>3.8</b> | <b>4.4</b> | <b>4.1</b> | <b>3.9</b> |
| Patient 17    | AMR          | 3.1        | 4.0        | 3.8        | /          | 3.7        | 3.9        |
| Patient 20    | AMR          | 3.8        | 4.3        | 3.8        | 5.2        | 3.9        | 4.4        |
| Patient 27    | AMR          | 3.7        | 5.5        | 4.5        | 5.2        | 4.4        | 4.9        |
| Patient 29    | AMR          | 3.5        | 4.9        | 4.6        | 4.6        | 4.5        | 4.6        |
| Patient 30    | AMR          | 3.6        | 5.3        | /          | /          | 4.8        | 5.7        |
| <b>Median</b> | <b>AMR</b>   | <b>3.6</b> | <b>4.9</b> | <b>4.2</b> | <b>5.2</b> | <b>4.4</b> | <b>4.6</b> |

22 D0, D22 and D44 correspond to the days before IVIg administration, and D1, D23 and D45 to  
 23 the days after IVIg administration (See Methods section).

24 NEG.: negative result (NAb titer < 2  $\log_{10}$  IC50)

25 Kidney transplant recipients who displayed low BKPyV NAb titers (< 4  $\log_{10}$  IC50) against  
 26 BKPyV genotype I and received IVIg therapy were:

27 - In the AMR group: 5/17 patients

28 - In the SIDS group: 16/16 patients

29

30 **Table S5:** BKPyV genotype II NAb titers ( $\log_{10}$  IC50) measured during IVIg treatment .

| Patients      | IVIg regimen | D0         | D1         | D22        | D23        | D44        | D45        |
|---------------|--------------|------------|------------|------------|------------|------------|------------|
| Patient 1     | SIDS         | NEG.       | 3.4        | /          | 3.8        | /          | /          |
| Patient 2     | SIDS         | 3.2        | 3.3        | 3.2        | 3.6        | 3.6        | 3.7        |
| Patient 3     | SIDS         | NEG.       | 2.9        | 2.9        | 2.9        | /          | 3.6        |
| Patient 4     | SIDS         | 3.21       | 3.9        | 3.4        | 3.4        | 2.8        | 3.6        |
| Patient 5     | SIDS         | NEG.       | 3.1        | 3.1        | 3.4        | 3.1        | 3.1        |
| Patient 6     | SIDS         | 3.0        | 4.0        | 3.5        | 4.0        | 3.1        | 3.2        |
| Patient 7     | SIDS         | 3.7        | 3.9        | 3.3        | 3.4        | 3.5        | 3.2        |
| Patient 8     | SIDS         | 2.7        | 3.7        | 3.6        | 3.2        | 3.9        | 2.8        |
| Patient 9     | SIDS         | 2.9        | 3.2        | 3.2        | 3.3        | 3.4        | 3.4        |
| Patient 10    | SIDS         | 3.0        | 2.7        | 3.3        | 2.8        | /          | /          |
| Patient 11    | SIDS         | 3.0        | 3.1        | 2.7        | 3.1        | /          | 3.4        |
| Patient 13    | SIDS         | NEG.       | 3.1        | 2.6        | 2.8        | NEG.       | /          |
| Patient 14    | SIDS         | NEG.       | 2.9        | /          | 3.2        | /          | /          |
| Patient 15    | SIDS         | 3.1        | 4.2        | 2.8        | /          | NEG.       | /          |
| Patient 16    | SIDS         | NEG.       | 3.0        | 2.5        | /          | /          | 3.6        |
| <b>Median</b> | <b>SIDS</b>  | <b>2.9</b> | <b>3.2</b> | <b>3.2</b> | <b>3.3</b> | <b>3.1</b> | <b>3.4</b> |
| Patient 17    | AMR          | 2.5        | 4.0        | 3.3        | /          | 3.4        | 4.4        |
| Patient 18    | AMR          | 3.9        | 4.7        | 4.1        | 4.6        | 3.8        | 4.1        |
| Patient 19    | AMR          | 2.6        | 4.4        | 4.2        | 4.3        | 3.7        | 4.4        |
| Patient 20    | AMR          | 3.8        | 4.0        | 3.7        | 4.4        | 3.4        | 3.7        |
| Patient 21    | AMR          | 3.7        | /          | 3.8        | /          | 3.6        | 4.1        |
| Patient 22    | AMR          | 3.9        | 4.6        | 4.5        | 4.7        | 4.4        | 4.4        |
| Patient 23    | AMR          | 2.9        | 4.0        | 3.5        | 3.6        | 3.2        | 3.6        |
| Patient 24    | AMR          | 3.9        | 4.2        | 3.8        | 3.8        | 3.7        | 3.9        |
| Patient 25    | AMR          | 3.8        | 4.4        | 4.4        | 4.1        | 3.8        | 3.8        |
| Patient 27    | AMR          | NEG.       | 4.4        | 3.9        | 4.2        | 3.9        | 4.4        |
| Patient 29    | AMR          | NEG.       | 3.7        | 3.7        | 3.8        | 3.3        | 4.0        |
| Patient 30    | AMR          | NEG.       | 4.3        | /          | /          | 3.4        | 4.4        |
| Patient 31    | AMR          | NEG.       | /          | 3.7        | 4.1        | 3.6        | 4.0        |
| Patient 32    | AMR          | 3.9        | /          | 4.4        | 4.6        | 3.6        | 4.1        |
| Patient 33    | AMR          | 3.8        | 3.9        | 3.7        | 4.3        | 3.6        | 4.0        |
| <b>Median</b> | <b>AMR</b>   | <b>3.7</b> | <b>4.3</b> | <b>3.8</b> | <b>4.2</b> | <b>3.6</b> | <b>4.0</b> |

31 D0, D22 and D44 correspond to the days before IVIg administration, and D1, D23 and D45 to  
32 the days after IVIg administration (See Methods section).

33 NEG.: negative result (NAb titer < 2  $\log_{10}$  IC50)

34 Kidney transplant recipients who displayed low BKPyV NAb titers (< 4  $\log_{10}$  IC50) against  
35 BKPyV genotype II and received IVIg therapy were:

36 - In the AMR group: 15/17 patients

37 - In the SIDS group: 15/16 patients

38

39 **Table S6:** BKPyV genotype IV NAb titers ( $\log_{10}$  IC50) measured during IVIg treatment .

| Patients      | IVIg regimen | D0         | D1         | D22        | D23        | D44        | D45        |
|---------------|--------------|------------|------------|------------|------------|------------|------------|
| Patient 1     | SIDS         | NEG.       | 3.1        | /          | 2.6        | /          | /          |
| Patient 3     | SIDS         | NEG.       | 2.7        | 2.6        | NEG.       | /          | 3.0        |
| Patient 4     | SIDS         | NEG.       | NEG.       | NEG.       | NEG.       | NEG.       | 3.2        |
| Patient 5     | SIDS         | 2.6        | 2.8        | 2.8        | NEG.       | 2.9        | 2.5        |
| Patient 6     | SIDS         | NEG.       | 3.1        | 2.5        | 2.5        | NEG.       | NEG.       |
| Patient 7     | SIDS         | 3.2        | 3.6        | 3.3        | 2.6        | 3.5        | 3.2        |
| Patient 8     | SIDS         | NEG.       | 3.2        | 4.2        | 2.8        | 2.8        | 2.5        |
| Patient 9     | SIDS         | 2.7        | 2.8        | 2.6        | 2.8        | 3.6        | 3.3        |
| Patient 10    | SIDS         | NEG.       | NEG.       | 3.3        | NEG.       | /          | /          |
| Patient 11    | SIDS         | NEG.       | 2.7        | 2.8        | 3.6        | /          | 2.6        |
| Patient 13    | SIDS         | 3.0        | NEG.       | 2.7        | 3.3        | NEG.       | /          |
| Patient 14    | SIDS         | NEG.       | 2.5        | /          | NEG.       | /          | /          |
| Patient 15    | SIDS         | NEG.       | 2.6        | 2.6        | /          | NEG.       | /          |
| Patient 16    | SIDS         | NEG.       | NEG.       | NEG.       | /          | /          | 2.5        |
| <b>Median</b> | <b>SIDS</b>  | <b>2.1</b> | <b>2.7</b> | <b>2.7</b> | <b>2.7</b> | <b>2.5</b> | <b>2.8</b> |
| Patient 17    | AMR          | NEG.       | 3.2        | 2.9        | /          | 4.3        | 4.6        |
| Patient 18    | AMR          | NEG.       | 3.8        | 3.3        | 3.4        | 3.2        | 3.6        |
| Patient 19    | AMR          | NEG.       | 4.5        | 3.7        | 4.1        | 3.3        | 3.4        |
| Patient 20    | AMR          | 3.6        | 4.1        | 2.8        | 3.2        | 3.2        | 2.9        |
| Patient 21    | AMR          | 3.1        | /          | 4.3        | /          | 3.9        | 4.1        |
| Patient 22    | AMR          | 3.8        | 4.8        | 4.6        | 4.6        | 3.9        | 4.6        |
| Patient 23    | AMR          | 2.6        | 3.2        | NEG.       | 3.3        | 2.7        | 3.3        |
| Patient 24    | AMR          | 2.6        | 3.7        | 3.0        | 3.5        | 3.2        | 3.8        |
| Patient 26    | AMR          | 2.8        | 4.3        | 4.0        | 3.9        | 3.3        | 4.0        |
| Patient 27    | AMR          | 2.5        | 4.0        | 3.4        | 4.1        | 3.4        | 3.9        |
| Patient 28    | AMR          | 3.4        | 3.6        | 3.9        | /          | 3.7        | 4.4        |
| Patient 29    | AMR          | NEG.       | 3.7        | 3.3        | 4.0        | 3.7        | 4.1        |
| Patient 30    | AMR          | NEG.       | 3.9        | /          | /          | 3.2        | 3.3        |
| Patient 31    | AMR          | NEG.       | /          | 3.2        | 3.9        | 3.4        | 4.4        |
| Patient 32    | AMR          | 3.1        | /          | 2.9        | 2.9        | 2.9        | 3.5        |
| Patient 33    | AMR          | 2.7        | 3.0        | 2.7        | 3.1        | 2.6        | 2.6        |
| <b>Median</b> | <b>AMR</b>   | <b>2.7</b> | <b>3.9</b> | <b>3.3</b> | <b>3.9</b> | <b>3.3</b> | <b>3.9</b> |

40 D0, D22 and D44 correspond to the days before IVIg administration, and D1, D23 and D45 to  
41 the days after IVIg administration (See Methods section).

42 NEG.: negative result (NAb titer < 2  $\log_{10}$  IC50)

43 Kidney transplant recipients who displayed low BKPyV NAb titers (< 4  $\log_{10}$  IC50) against  
44 BKPyV genotype IV and received IVIg therapy were:

45 - In the AMR group: 16/17 patients

46 - In the SIDS group: 14/16 patients

47
